# Supplementary material
Source: HighWire-hosted journal article supplement (https://cmajopen.ca/highwire/filestream/90516/field_highwire_adjunct_files/0/open-2021-0037-original-submission.pdf)
Supplement: open-2021-0037-original-submission.pdf [file open-2021-0037-original-submission.pdf]

## Readiness of Emergency Departments for Pediatric Patients: A Systematic Review

Jessica A Harper MD<sup>1</sup>, Amanda Coyle MPH<sup>2,3</sup>, Clara Tam MSc<sup>2</sup>, Megan Skakum BSc<sup>2,4</sup>,  
Mirna Ragheb BN<sup>2,4</sup>, Lucy Wilson MScPH<sup>2,4</sup>, Mê-Linh Lê MA MLIS AHIP<sup>5</sup>, Terry P Klassen  
MD MSc<sup>1,2,6</sup>, Alex Aregbesola MD PhD<sup>1,2</sup>

<sup>1</sup>Department of Pediatrics and Child Health, University of Manitoba, Winnipeg, Canada

<sup>2</sup>Children's Hospital Research Institute of Manitoba, University of Manitoba, Winnipeg, Canada

<sup>3</sup>Faculty of Medicine and Dentistry, University of Alberta, Edmonton, Canada

<sup>4</sup>Max Rady College of Medicine, University of Manitoba, Winnipeg, Canada

<sup>5</sup>Neil John Maclean Health Sciences Library, University of Manitoba, Winnipeg, Canada

<sup>6</sup>Centre for Healthcare Innovation, University of Manitoba, Winnipeg, Canada

### Corresponding Author:

Dr. Jessica Harper

E-mail: jharper6@manitoba-physicians.ca

**Funding:** The study was supported by a grant from the Manitoba Medical Service Foundation awarded to Dr. Alex Aregbesola, and a grant from the Children's Hospital Foundation of Manitoba awarded to Dr. Terry Klassen.

**Competing Interests:** None to declare

### Contributions:

All authors contributed to the conception and design of the work, and the acquisition, analysis and interpretation of the data. All authors drafted the manuscript, revised it critically for important intellectual content, and provided final approval of the version to be published. All authors agree to be accountable for all aspects of the work.

## ABSTRACT

### **Background:**

The majority of children that need emergency care visit general emergency departments (EDs) and urgent care centres, which have a wide range of experience with pediatric patient care. The weighted pediatric readiness score (WPRS) is currently used to evaluate EDs readiness for pediatric patients. The aim of this study was to determine if a higher WPRS was associated with decreased mortality, improved health outcomes, and healthcare utilization.

### **Methods:**

A systematic review was completed. A comprehensive search strategy was developed and implemented in MEDLINE(OVID), Embase(Ovid), the Cochrane Library(Wiley), CINAHL(EBSCO), Global Health(Ovid), and Scopus from inception until May 25, 2020 and then an updated search was performed on June 16, 2021. Articles identified were screened for inclusion by 2 independent reviewers. Articles included in the final analysis were assessed for quality and bias using the Newcastle-Ottawa Scale.

### **Results:**

The initial search identified 1263 articles, and the updated search identified 186 more articles. Of these articles, 6 were included in the final analysis. Three of the 6 studies showed an inverse association between WPRS and pediatric mortality (pooled OR 0.52, 95%CI 0.2 to 1.06) in random effect meta-analysis. Other studies reported that higher WPRS was associated with shorter length of stay in hospital ( $\beta$  -0.36, 95%CI -0.61 to -0.10) and less interfacility transfers (OR 0.55, 95%CI 0.33 to 0.93).

### **Interpretation:**

Children presenting to EDs with higher WPRS have a lower risk of mortality. These findings can help advocate for improved pediatric readiness across EDs in order to improve outcomes.

**Protocol:** PROSPERO-CRD42020191149

## INTRODUCTION

Children make up approximately 20% of the total emergency department (ED) visits in Canada<sup>1</sup> and the United States<sup>2</sup> each year. A portion of these ED visits are to specialized pediatric EDs, however the majority of the visits are to general EDs or urgent care centres, which have a wide range of experience with pediatric patient care.<sup>3</sup> Therefore, it is important to ensure all EDs are optimizing pediatric patient outcomes and safety independent of their pediatric patient volumes, location, or presentations.

There is a growing literature evaluating ED readiness to provide optimal medical care to acutely ill and injured pediatric patients. The weighted pediatric readiness score (WPRS) was developed as part of the National Pediatric Readiness Project (NPRP)<sup>4</sup> to assess the level of readiness of EDs to care for pediatric patients. The 100-point scale includes weighted items in the categories of pediatric specific infrastructure, administration and coordination, personnel, pediatric-specific policies, equipment, and resources.<sup>5</sup> The goal of the WPRS is to identify areas of improvement for EDs in order to maximize readiness to care for pediatric patients.<sup>3-6</sup> The NPRP assessment of EDs across the United States in 2013 identified that the median WPRS was 68.9, suggesting that many EDs are missing key components of pediatric readiness.<sup>5</sup>

Recent literature also suggests that higher pediatric readiness scores are associated with better pediatric patient outcomes, including a recent study by Ames et al who found that high pediatric readiness scores are associated with a 4-fold decreased risk of mortality,<sup>7</sup> however there is not yet consensus in the literature. Therefore, the primary objective of this study was to conduct a systematic review and meta-analysis to determine if a higher pediatric readiness score results in a decreased mortality rate for children presenting to EDs and urgent care centres. The secondary objective was to determine if higher pediatric readiness scores result in improved healthcare outcomes and healthcare utilization.

## METHODS

The systematic review was reported in accordance with the PRISMA 2020 statement,<sup>8</sup> and the protocol was registered with PROSPERO in June 2020 (registration number CRD42020191149). The primary objective of the study was to determine if higher WPRS is associated with lower rates of mortality in children presenting to EDs and urgent care centres, by synthesising current research and conducting meta-analysis where possible. The secondary objective of this review was to determine if higher WPRS results in improved healthcare outcomes and utilization of healthcare resources.

### **Search strategy and study selection**

A systematic search of the literature was completed to identify potentially relevant studies. An experienced health sciences librarian designed and executed the search strategy, using a combination of subject terms and keywords that were later translated for each database. A slightly modified version of a validated filter was used to focus the search on a pediatric population.<sup>9</sup> Searches were performed in MEDLINE (OVID), Embase (Ovid), the Cochrane Library (Wiley), CINAHL (EBSCO), Global Health (Ovid), and Scopus from inception until May 25, 2020 and then an updated search was performed on June 16, 2021. The MEDLINE

1  
2  
3 search was peer-reviewed by an independent health sciences librarian as per the PRESS  
4 guidelines.<sup>10</sup> Our search strategy is available in Appendix 1. The searches were designed to be  
5 broad and no restrictions were used. Identified studies were deduplicated in EndNote (Version  
6 X9).  
7

8  
9 We included studies if they met all of the following criteria: (1) conducted in an acute  
10 care facility that care for children, including EDs or Urgent Care Centres, (2) used the pediatric  
11 readiness score or WPRS, (3) compared low versus high or use versus non use of WPRS, (4)  
12 included one of the relevant outcomes, such as mortality, healthcare outcomes, or healthcare  
13 utilization, (5) observational studies, including cohort and cross-sectional studies, or controlled-  
14 clinical study, and (5) published in English language. Studies were excluded if the outcome was  
15 not relevant, did not include pediatric patients (defined as age  $\leq 21$  years), or if setting was  
16 outside of an acute care facility.  
17  
18

19 The articles identified in the literature search were first screened by title and abstracts for  
20 inclusion in the systematic review by two independent reviewers. The two independent reviewers  
21 then reviewed the full-length manuscripts for inclusion in the final analysis. Disagreements  
22 during screening were resolved by discussion between reviewers.  
23  
24

### 25 **Data Extraction**

26 The data from the included studies was extracted by two independent reviewers.  
27 Reviewers used a customized data extraction tool to identify key characteristics of the articles,  
28 including information on study design, objectives, population, intervention, outcomes, and  
29 conclusion details. The tool was used to pilot test five studies after which it was adopted for the  
30 entire included studies. A third reviewer examined the data to ensure accuracy and identified any  
31 errors.  
32  
33

### 34 **Risk of bias assessment**

35 The included articles were assessed for quality and bias using the Newcastle-Ottawa  
36 Scale (NOS),<sup>11</sup> a validated critical appraisal checklists for nonrandomised observational studies.  
37 The NOS rates articles on a star system in order to evaluate the selection of study groups,  
38 comparability of groups, and ascertainment of exposure or outcome of interest.<sup>11</sup> Two reviewers  
39 independently completed the risk of bias assessment, and disagreements were resolved by a third  
40 reviewer.  
41  
42

### 43 **Data Analysis and Synthesis**

44 Data were collected and managed using Excel and Covidence. Individual article  
45 characteristics were summarized and presented in tabular form, and the results were thematically  
46 compared based on the systematic review of primary and secondary objectives. We used Review  
47 Manager 5.4. to perform the statistical analysis to generate the forest plot that showed the point  
48 estimates with 95% confidence interval (CI) of the studies included in the meta-analysis.  
49  
50

51 The association between WPRS and mortality was examined in random-effects models.  
52 The pooled estimate of odds ratio (OR) with 95% CI was computed and demonstrated  
53 graphically with a diamond in the forest plot. The  $I^2$  statistic was calculated to quantify study  
54 heterogeneity.  
55  
56  
57  
58

## RESULTS

### Search results

The search and study screening were conducted initially in May 2020, with an update performed in June 2021 (Figure 1). The initial systematic search of the databases identified 1263 articles. After duplicates articles were excluded (n=596), 667 abstracts were included in the initial screening process. After reviewing titles and abstracts, 12 articles were included in the full text review. Of the full text manuscripts reviewed, 9 were excluded, resulting in 3 studies included in the final analysis. Reasons for article exclusion included no abstract (n=86, 12%), no full text article (n=4, 1%), wrong population (n=407, 59%), wrong intervention (n=125, 18%), wrong control (n=9, 1%), wrong outcome (n=19, 3%), or wrong study design (n=14, 2%).

The updated search identified 186 more articles. After duplicates were excluded (n=80), 106 articles were screened for eligibility. After reviewing the titles and abstracts, 13 articles were included in the full text review. A further 10 studies were excluded based on wrong publication type (n=1), wrong study design (n=1), wrong population (n=1), wrong intervention (n=3), wrong outcome (n=3), and previously included in the initial screening (n=1). Therefore, 3 further studies were included in the final analysis from the update, resulting in a total of 6 studies included in the final analysis.

### Characteristics of included studies

Characteristics of studies included in the analysis are presented in Table 1. Of the six included studies, 5 were conducted in the United States<sup>7,12-15</sup> and 1 in Latvia.<sup>16</sup> All 6 studies were completed in EDs.

### Outcomes

#### *Primary Outcome: Mortality*

Three studies included the primary outcome of interest pediatric mortality<sup>7,13,16</sup> (Table 2). The study by Ames et al<sup>7</sup> compared high and low WPRS scores with EDs' mortality rates, presented as OR. The study demonstrated that critically ill children have a significantly lower risk of mortality if they present to an ED with a high WPRS (4<sup>th</sup> quartile: OR 0.25, 95% CI 0.18 to 0.37).<sup>7</sup> Secondary analysis showed no significant association between ED pediatric readiness scores and mortality for children with cardiac arrest (4<sup>th</sup> quartile: OR 0.23, 95% CI 0.02 to 2.16) or sepsis (4<sup>th</sup> quartile: OR 0.59, 95% CI 0.05 to 7.31). However they did identify a significant decrease in mortality risk for children with traumatic brain injury (TBI) presenting to EDs with WPRS in the 4<sup>th</sup> quartile (OR 0.21, 95% CI 0.06 to 0.78).<sup>7</sup> The second study by Balmaks et al<sup>16</sup> demonstrated that higher WPRS was associated with lower 6-month mortality (OR 0.93, 95% CI 0.88 to 0.98). The study by Newgard et al<sup>13</sup> evaluated the association between ED pediatric readiness and in hospital mortality among injured children presenting to trauma centres. This study also demonstrated that injured children who were treated in trauma centres with high WPRS had lower risk of mortality (4<sup>th</sup> quartile: OR 0.58, 95% CI 0.45 to 0.75).

Random effects meta-analysis was conducted to examine the association between WPRS and mortality (Figure 2). The pooled estimate of OR of the 3 included studies<sup>7,13,16</sup> was 0.52 (95% CI 0.26 to 1.06). I<sup>2</sup> was 97%, indicating high heterogeneity between the three studies.

### *Secondary Outcome: Healthcare Outcomes and Utilization*

Four studies included the secondary outcome of interest<sup>12,14–16</sup> (Table 3). The study by Ray et al<sup>12</sup> quantified children's geographic access to EDs in the United States with high WPRS. They identified that 93.7% of children have access to an ED within a 30 minute drive.<sup>12</sup> 33.7% of children in the US have access to an ED with WPRS of 100<sup>th</sup> percentile, and 55.3% had WPRS score  $\geq$  90<sup>th</sup> percentile.<sup>12</sup> The study by Balmaks et al<sup>16</sup> showed that higher WPRS was associated with shorter ICU length of stay ( $\beta$   $-0.06$ , 95% CI  $-0.10$  to  $-0.01$ ) and shorter hospital length of stay ( $\beta$   $-0.36$ , 95% CI  $-0.61$  to  $-0.10$ ).

Both studies by Lieng et al<sup>14,15</sup> investigated the association between WPRS and transfers between facilities. Lieng et al<sup>14</sup> found that a 10 point increase in WPRS is associated with lower odds of potentially avoidable transfers in injured (OR 0.92, 95% CI 0.86 to 0.98) and noninjured (OR 0.94, 95% CI 0.88 to 1.00) children. Additionally, Lieng et al<sup>15</sup> concluded that children presenting to small rural hospital EDs with higher WPRS are less likely to be transferred to another facility (OR 0.55, 95% CI 0.33 to 0.93).

### **Risk of bias across studies**

The Newcastle-Ottawa Scale (NOS)<sup>11</sup> was used to evaluate the included studies. The results of the assessment are presented in Table 4. All 6 studies were rated as having a low risk of bias in all categories, except all scored high risk for selection bias as none could demonstrate that the outcome of interest was not present at the start of the study.

### **INTERPRETATION**

To our knowledge, this is the first systematic review examining the impact of a higher pediatric readiness score on pediatric patient outcomes. Our findings highlight that a critically ill or injured child who presents to an ED with a high pediatric readiness score has a lower risk of mortality than a child presenting to an ED with low pediatric readiness score. Our study also identified that higher pediatric readiness scores as assessed by WPRS are associated with shorter length of stay in hospital and lower rates of interfacility transfer, which can have an impact on patient outcomes.

The three articles included in the systematic review that assessed pediatric mortality in relation to WPRS found that higher WPRS significantly lowers the risk of mortality.<sup>7,13,16</sup> All studies looked at a diverse range of centres and pediatric volumes, suggesting that these findings are relevant for a wide range of different EDs. When combined in the random effects meta-analysis, there was a trend towards higher WPRS being associated with lower risk of mortality. These findings have important implications for pediatric emergency medicine, as they support all hospitals advocating for improved access to pediatric specific resuscitation equipment, medication dosing, interfacility transfer guidelines, ED policies, and care coordinators.<sup>4</sup> As higher WPRS and being more prepared to care for critically ill and injured children directly impacts risk of mortality, emphasis should be placed on preparing all EDs for children.

The systematic review also highlighted a number of important healthcare utilization outcomes associated with pediatric readiness. Length of stay in the intensive care unit and hospital is a common quality indicator for patient care, as well as an important factor when considering hospital resource allocation.<sup>17</sup> Length of stay is a multifactorial measure, however if



1  
2  
3 by increasing WPRS hospital length of stay decreases this has positive impact on the patient,  
4 patient outcomes, and hospital costs and resource use.  
5  
6

7 Ill and injured children present to a wide variety of EDs. Ray et al<sup>12</sup> identified that 93.7%  
8 of children in the United States live within a 30 minute drive of any ED, however only 33.7% of  
9 children live within a 30 minute drive of an ED with WPRS of 100. Improving ED readiness to  
10 children in all types of centres could lead to improved mortality rates for children.<sup>18-20</sup> As well, if  
11 children are presenting to hospitals with low readiness scores, they are more likely to require  
12 interfacility transportation, as concluded by Leing et al.<sup>14,15</sup> Although sometimes necessary,  
13 interfacility patient transfers can have increased risk of psychological distress, delay in accessing  
14 care, repetition of care, communication issues, increased mortality, and increased costs.<sup>5,21</sup>  
15  
16

### 17 **Limitations**

18 There are a number of limitations to the study. One limitation is that there were relatively  
19 few studies identified during the systematic review, which limits the strength of the meta-  
20 analysis. We were also unable to conduct a meta-analysis for the secondary outcomes due to the  
21 wide range of outcomes in the included studies. However, the secondary outcomes consistently  
22 supported the improvement of WPRS in EDs. The WPRS is a relatively new score,<sup>4,5</sup> which may  
23 explain why there is limited published data on readiness scores and pediatric outcomes. Although  
24 we performed a comprehensive literature search and had 2 individuals screening articles, there is  
25 a possibility that relevant studies could have been missed.  
26  
27

### 28 **Future Directions**

29 Future research is needed to continue to explore the association between pediatric  
30 readiness scores and mortality, as well as the role of WPRS in EDs in rural or remote  
31 communities, and whether location impacts WPRS and mortality. In order to advocate for  
32 implementation of WPRS and pediatric readiness in all EDs, barriers to implementation and  
33 strategies for improvement should be explored as well. More rigorous studies of WPRS, such as  
34 randomized control trials, would be beneficial in order to identify evidence based strategies to  
35 improve WPRS and pediatric mortality.  
36  
37  
38  
39

### 40 **Conclusion**

41 Children presenting to emergency departments with higher pediatric readiness scores  
42 have a lower risk of mortality and better health outcomes. These findings can help advocate for  
43 improved pediatric readiness across EDs in order to improve outcomes.  
44  
45  
46  
47

### 48 **ACKNOWLEDGEMENTS**

49 We thank the administrative staff of The Children's Hospital Research Institute of Manitoba for  
50 their support and contributions to our research work.  
51  
52  
53  
54  
55  
56  
57  
58

1  
2  
3  
4  
5  
6  
7  
8  
9  
10  
11  
12  
13  
14  
15  
16  
17  
18  
19  
20  
21  
22  
23  
24  
25  
26  
27  
28  
29  
30  
31  
32  
33  
34  
35  
36  
37  
38  
39  
40  
41  
42  
43  
44  
45  
46  
47  
48  
49  
50  
51  
52  
53  
54  
55  
56  
57  
58  
59  
60

Confidential



## REFERENCES

1. National Ambulatory Care Reporting System - Canadian Institute for Health Information. Emergency Department (ED) Visits: Volumes and Median Length of Stay by Triage Level, Visit Disposition, and Main Problem [Internet]. Available from: <https://www.cihi.ca/en/nacrs-emergency-department-ed-visits-volumes-and-median-length-of-stay-by-triage-level-visit>
2. Moore B, Stocks C, Owens P. Trends in Emergency Department Visits, 2006–2014. HCUP Statistical Brief #227. Rockville, MD;
3. Remick K, Gausche-Hill M, Joseph MM, Brown K, Snow SK, Wright JL, et al. Pediatric Readiness in the Emergency Department. *Ann Emerg Med*. 2018;72(6):e123–36.
4. Pediatric Readiness Project. Pediatric emergency department pediatric readiness resource site [Internet]. Available from: <https://emscimprovement.center/domains/pediatric-readiness/>
5. Gausche-Hill M, Ely M, Schmuhl P, Telford R, Remick KE, Edgerton EA, et al. A national assessment of pediatric readiness of emergency departments. *JAMA Pediatr*. 2015;169(6):527–34.
6. Krug SE, Bojko T, Fein JA, Fitzmaurice LS, Frush KS, Hampers LC, et al. Joint policy statement - Guidelines for care of children in the emergency department. *Pediatrics*. 2009;124(4):1233–43.
7. Ames SG, Davis BS, Marin JR, Fink EL, Olson LM, Gausche-Hill M, et al. Emergency department pediatric readiness and mortality in critically ill children. *Pediatrics*. 2019;144(3).
8. Page MJ, McKenzie JE, Bossuyt PM, Boutron I, Hoffmann TC, Mulrow CD, et al. The PRISMA 2020 statement: An updated guideline for reporting systematic reviews. *BMJ*. 2021;372.
9. Leclercq E, Leeftang M, van Dalen E, Kremer L. Validation of search filters for identifying pediatric studies in PubMed. *J Pediatr*. 2013;162(3):629–34.
10. McGowan J, Sampson M, Salzwedel D, Cogo E, Foerster V, Lefebvre C. PRESS Peer Review of Electronic Search Strategies: 2015 Guideline Statement. *J Clin Epidemiol*. 2016;75:40–6.
11. Wells G, Shea B, O’Connell D, Peterson J, Welch V, Losos M, et al. The Newcastle-Ottawa Scale (NOS) for assessing the quality if nonrandomized studies in meta-analyses [Internet]. 2012. Available from: [http://www.ohri.ca/programs/clinical\\_epidemiology/oxford.asp](http://www.ohri.ca/programs/clinical_epidemiology/oxford.asp)
12. Ray KN, Olson LM, Edgerton EA, Ely M, Gausche-Hill M, Schmuhl P, et al. Access to High Pediatric-Readiness Emergency Care in the United States. *J Pediatr* [Internet]. 2018;194:225-232.e1. Available from: <https://doi.org/10.1016/j.jpeds.2017.10.074>
13. Newgard CD, Lin A, Olson LM, Cook JNB, Gausche-Hill M, Kuppermann N, et al. Evaluation of Emergency Department Pediatric Readiness and Outcomes among US Trauma Centers. *JAMA Pediatr*. 2021;175(9):947–56.
14. Lieng MK, Marcin JP, Dayal P, Tancredi DJ, Swanson MB, Haynes SC, et al. Emergency Department Pediatric Readiness and Potentially Avoidable Transfers. *J Pediatr*. 2021;236:229–37.
15. Lieng MK, Marcin JP, Sigal IS, Haynes SC, Dayal P, Tancredi DJ, et al. Association between emergency department pediatric readiness and transfer of noninjured children in

- 1  
2  
3 small rural hospitals. *J Rural Heal*. 2021;1–10.
- 4 16. Balmaks R, Whitfill TM, Ziemele B, Blumberga M, Upenieks R, Vegeris I, et al. Pediatric  
5 Readiness in the Emergency Department and Its Association With Patient Outcomes in  
6 Critical Care. *Pediatr Crit Care Med*. 2020;1.
- 7 17. Pollack MM, Holubkov R, Reeder R, Dean JM, Meert KL, Berg RA, et al. PICU Length  
8 of stay: Factors associated with bed utilization and development of a benchmarking  
9 model. *Pediatr Crit Care Med*. 2018;19(3):196–203.
- 10 18. Whitfill T, Gawel M, Auerbach M. A Simulation-Based Quality Improvement Initiative  
11 Improves Pediatric Readiness in Community Hospitals. *Pediatr Emerg Care*.  
12 2018;34(6):431–5.
- 13 19. Abulebda K, Lutfi R, Whitfill T, Abu-Sultaneh S, Leeper KJ, Weinstein E, et al. A  
14 Collaborative In Situ Simulation-based Pediatric Readiness Improvement Program for  
15 Community Emergency Departments. *Acad Emerg Med*. 2018;25(2):177–85.
- 16 20. Abulebda K, Whitfill T, Montgomery EE, Thomas A, Dudas RA, Leung JS, et al.  
17 Improving Pediatric Readiness in General Emergency Departments: A Prospective  
18 Interventional Study. *J Pediatr*. 2021;230:230-237.e1.
- 19 21. Rosenthal JL, Atolagbe O, Hamline M, Li S-TT, Toney A, Witkowski J, et al. Developing  
20 and Validating a Pediatric Potentially Avoidable Transfer Quality Metric. *Am J Med*  
21 *Qual*. 2020;35(2):163–70.
- 22  
23  
24  
25  
26  
27  
28  
29  
30  
31  
32  
33  
34  
35  
36  
37  
38  
39  
40  
41  
42  
43  
44  
45  
46  
47  
48  
49  
50  
51  
52  
53  
54  
55  
56  
57  
58  
59  
60

# Readiness of Emergency Departments for Pediatric Patients: A Systematic Review

## Table 1. Study Characteristics

| Publication, Country                             | Study design         | Study period                                                                                           | Type of centre, N | Study objective                                                                                                                                                                                                                  | Volume of ED                                                                                                                                                                                                                                                                                                                                                                                                                                                                                                                                                                                                                                                                                                                                                                                                                                                                                                                                  | Number of participants | Mean age (age range)                                                                                                                               |
|--------------------------------------------------|----------------------|--------------------------------------------------------------------------------------------------------|-------------------|----------------------------------------------------------------------------------------------------------------------------------------------------------------------------------------------------------------------------------|-----------------------------------------------------------------------------------------------------------------------------------------------------------------------------------------------------------------------------------------------------------------------------------------------------------------------------------------------------------------------------------------------------------------------------------------------------------------------------------------------------------------------------------------------------------------------------------------------------------------------------------------------------------------------------------------------------------------------------------------------------------------------------------------------------------------------------------------------------------------------------------------------------------------------------------------------|------------------------|----------------------------------------------------------------------------------------------------------------------------------------------------|
| Ray et al, 2018, United States <sup>12</sup>     | Cross-sectional      | Data collection: January 1 to August 23, 2013                                                          | ED, 4090          | To determine the geographic accessibility of emergency departments (EDs) with high pediatric readiness by assessing the percentage of US children living within a 30-min drive time of an ED with high pediatric readiness.      | Number of ED centres, ED Volume<br>N = 739, Low (<4999) visits<br>N = 490, Medium (5000–9999) visits<br>N = 2861, High (>10 000) visits                                                                                                                                                                                                                                                                                                                                                                                                                                                                                                                                                                                                                                                                                                                                                                                                       | N/A                    | N/A<br>(0–17 years)                                                                                                                                |
| Ames et al, 2019, United States <sup>7</sup>     | Retrospective cohort | Data collection: January 1 to August 31, 2013                                                          | ED, 426           | To determine the proportion of patients presenting to EDs with various levels of pediatric readiness and to evaluate if ED pediatric readiness is associated with mortality.                                                     | Number of ED centres, annual pediatric ED volume reported in quartiles (Q1 lowest WPRS and Q4 highest WPRS): frequency (%)<br><br>Low (<1800) visits: N = 107, Q1: 64 (59.8)<br>N = 106, Q2: 52 (49.1)<br>N = 107, Q3: 29 (27.1)<br>N = 106, Q4: 8 (7.5)<br><br>Medium (1800–4999) visits: N = 107, Q1: 26 (24.3)<br>N = 106, Q2: 34 (32.1)<br>N = 107, Q3: 37 (34.6)<br>N = 106, Q4: 16 (15.1)<br><br>Medium-to-high (5000–9999) visits: N = 107, Q1: 14 (13.1)<br>N = 106, Q2: 13 (12.3)<br>N = 107, Q3: 22 (20.6)<br>N = 106, Q4: 20 (18.9)<br><br>High (>10000) visits: N = 107, Q1: 3 (2.8)<br>N = 106, Q2: 7 (6.6)<br>N = 107, Q3: 19 (17.8)<br>N = 106, Q4: 62 (58.5)                                                                                                                                                                                                                                                                  | 20483                  | Mean age reported in quartiles<br><br>Q1: 8.5 ± 6.6 years<br>Q2: 9.6 ± 6.0 years<br>Q3: 6.9 ± 6.2 years<br>Q4: 7.0 ± 5.9 years<br><br>(0–18 years) |
| Balmaks et al, 2020, Latvia <sup>16</sup>        | Prospective cohort   | Data collection: June 1, 2017 to May 31, 2018<br><br>Recruitment: September 24, 2017 to April 26, 2018 | ED, 16            | To assess the quality of pediatric acute care and pediatric readiness and determine their association with patient outcomes using a patient registry.                                                                            | Number of ED centres, ED volume: median total pediatric population/year (IQR)<br><br>N = 5, Low (<1800) visits: 1238 (809–11916)<br>N = 6, Medium (1800–4999) visits: 2746 (1965–3000)<br>N = 4, Medium-to-high (5000–9999) visits: 7703 (5572–7160)<br>N = 1, High (>10000) visits: 63905                                                                                                                                                                                                                                                                                                                                                                                                                                                                                                                                                                                                                                                    | 254                    | Mean = N/A<br><br>Median age = 61 months<br><br>(17–159 months)                                                                                    |
| Lieng et al, 2021, United States <sup>14</sup>   | Cross-sectional      | Data collection: January 1, 2011 to December 31, 2013                                                  | ED, 283           | To determine the association between potentially avoidable transfers (PATs) and ED pediatric readiness scores and the score's associated components.                                                                             | Number of ED centres, ED volume<br><br>N = 275, median (IQR) = 6820 (3148–11042)<br>N = 269, median (IQR) = 6876 (3167–11046)                                                                                                                                                                                                                                                                                                                                                                                                                                                                                                                                                                                                                                                                                                                                                                                                                 | 25601                  | N/A<br>(0–18 years)                                                                                                                                |
| Lieng et al, 2021, United States <sup>15</sup>   | Cross-sectional      | Data collection: 2011 to 2012                                                                          | ED, 54            | To determine the association of pediatric readiness scores with the odds of interfacility transfer among a cohort of noninjured children (< 18 years old) presenting to EDs in small rural hospitals in the state of California. | Number of ED centres, ED volume<br><br>Low WPRS ≤ 70<br>N = 44, median (IQR) = 2194 (1350–4412)<br><br>High WPRS >70<br>N = 10, median (IQR) = 2696 (1618–4694)                                                                                                                                                                                                                                                                                                                                                                                                                                                                                                                                                                                                                                                                                                                                                                               | 135388                 | N/A<br>(0–18 years)                                                                                                                                |
| Newgard et al, 2021, United States <sup>13</sup> | Retrospective cohort | Data collection: January 1, 2012 to December 31, 2017                                                  | ED, 832           | To evaluate the association between ED pediatric readiness, in-hospital mortality, and in-hospital complications among injured children presenting to US trauma centers.                                                         | Number of ED centres, Annual pediatric ED volume in quartiles:<br><br>Low (1–4,900), n (%): N = 832, Overall: 160 (19.2%)<br>N = 217, Q1: 51 (23.5%)<br>N = 199, Q2: 45 (22.6%)<br>N = 221, Q3: 41 (18.6%)<br>N = 195, Q4: 23 (11.8%)<br><br>Medium (4,900–8,400), n (%): N = 832, Overall: 86 (10.3%)<br>N = 217, Q1: 19 (8.8%)<br>N = 199, Q2: 27 (13.6%)<br>N = 221, Q3: 21 (9.5%)<br>N = 195, Q4: 19 (9.7%)<br><br>Medium-to-high (8,400–13,800), n (%): N = 832, Overall: 105 (12.6%)<br>N = 217, Q1: 13 (6.0%)<br>N = 199, Q2: 23 (11.6%)<br>N = 221, Q3: 36 (16.3%)<br>N = 195, Q4: 33 (16.9%)<br><br>High (>13,800), n (%): N = 832, Overall: 186 (22.4%)<br>N = 217, Q1: 9 (4.2%)<br>N = 199, Q2: 22 (11.1%)<br>N = 221, Q3: 67 (30.3%)<br>N = 195, Q4: 88 (45.1%)<br><br>Unknown, n (%): N = 832, Overall: 295 (35.5%)<br>N = 217, Q1: 125 (57.6%)<br>N = 199, Q2: 82 (41.2%)<br>N = 221, Q3: 56 (25.3%)<br>N = 195, Q4: 32 (16.3%) | 372004                 | Mean = N/A<br><br>Median age = 10 years<br><br>(4–15 years)                                                                                        |

Note: ED = Emergency Department, WPRS = Weighted Pediatric Readiness Score, PAT = Potentially Avoidable Transfer, IQR = Interquartile Range, N/A = Not Applicable

## Readiness of Emergency Departments for Pediatric Patients: A Systematic Review

**Table 2.** Primary Outcome: Mortality

| Publication                       | Intervention vs. Comparator | Primary outcome | Primary outcome effect estimate | Primary outcome results (unadjusted)                                                                                                                                                                                                                                                                                                                                                                                                                         | Variables used to adjust Primary outcome                                                                                                                                                                                                                                        | Primary outcome results [adjusted]                                                                                                                                                                                                                                                                                                                                                                                                                                                                                                                                                                                                                                                                                                                                                                                                                                                                                                                                                                                                                                                                                                                                                                                                                | Conclusion                                                                                                                                                                                                                                                                                         |
|-----------------------------------|-----------------------------|-----------------|---------------------------------|--------------------------------------------------------------------------------------------------------------------------------------------------------------------------------------------------------------------------------------------------------------------------------------------------------------------------------------------------------------------------------------------------------------------------------------------------------------|---------------------------------------------------------------------------------------------------------------------------------------------------------------------------------------------------------------------------------------------------------------------------------|---------------------------------------------------------------------------------------------------------------------------------------------------------------------------------------------------------------------------------------------------------------------------------------------------------------------------------------------------------------------------------------------------------------------------------------------------------------------------------------------------------------------------------------------------------------------------------------------------------------------------------------------------------------------------------------------------------------------------------------------------------------------------------------------------------------------------------------------------------------------------------------------------------------------------------------------------------------------------------------------------------------------------------------------------------------------------------------------------------------------------------------------------------------------------------------------------------------------------------------------------|----------------------------------------------------------------------------------------------------------------------------------------------------------------------------------------------------------------------------------------------------------------------------------------------------|
| Ames et al, 2019 <sup>7</sup>     | High WPRS vs. Low WPRS      | Mortality       | OR                              | N/A                                                                                                                                                                                                                                                                                                                                                                                                                                                          | Age, chronic complex conditions, and severity of illness                                                                                                                                                                                                                        | <p>Corresponding WPRS (mean <math>\pm</math> SD) to quartiles:<br/>           Q1: WPRS (48.2 <math>\pm</math> 6.4)<br/>           Q2: WPRS (66.9 <math>\pm</math> 4.4)<br/>           Q3: WPRS (81.5 <math>\pm</math> 3.7)<br/>           Q4: WPRS (95.0 <math>\pm</math> 3.6)</p> <p>WPRS associated with presenting hospital and in-hospital mortality in quartiles, OR (95% CI), P-value:<br/>           Q1: 1.00<br/>           Q2: 0.52 (0.30 to 0.90), P = 0.018<br/>           Q3: 0.36 (0.22 to 0.58), P &lt; 0.001<br/>           Q4: 0.25 (0.18 to 0.37), P &lt; 0.001</p> <p>Cardiac arrest OR (95% CI), P-value:<br/>           Q1: 1.00<br/>           Q2: 0.70 (0.05 to 10.78), P = 0.802<br/>           Q3: 0.22 (0.02 to 2.57), P = 0.229<br/>           Q4: 0.23 (0.02 to 2.16), P = 0.198</p> <p>Sepsis OR (95% CI), P-value:<br/>           Q1: 1.00<br/>           Q2: 1.84 (0.12 to 29.21), P = 0.666<br/>           Q3: 0.57 (0.05 to 7.11), P = 0.662<br/>           Q4: 0.59 (0.05 to 7.31), P = 0.680</p> <p>TBI OR (95% CI), P-value:<br/>           Q1: 1.00<br/>           Q2: 0.62 (0.12 to 3.12), P = 0.560<br/>           Q3: 0.72 (0.19 to 2.73), P = 0.629<br/>           Q4: 0.21 (0.06 to 0.78), P = 0.020</p> | This study demonstrated that critically ill children presenting to hospitals with a high pediatric readiness score is associated with decreased mortality. Efforts to increase ED readiness for pediatric emergencies may improve patient outcomes.                                                |
| Balmaks et al, 2020 <sup>16</sup> | High WPRS vs. Low WPRS      | Mortality       | OR                              | N/A                                                                                                                                                                                                                                                                                                                                                                                                                                                          | Nesting of patients in each ED, and patient demographics                                                                                                                                                                                                                        | WPRS associated with 6-month mortality, OR (95% CI), P-value:<br>OR 0.93 (0.88 to 0.98), P = 0.011                                                                                                                                                                                                                                                                                                                                                                                                                                                                                                                                                                                                                                                                                                                                                                                                                                                                                                                                                                                                                                                                                                                                                | This study nationally assessed that pediatric readiness in EDs, in Latvia, was associated with shorter ICU length of stay, shorter hospital length of stay, and lower 6-month mortality.                                                                                                           |
| Newgard et al, 2021 <sup>13</sup> | High WPRS vs. Low WPRS      | Mortality       | OR                              | ED pediatric readiness score association with in-hospital mortality, OR (95% CI), p-value:<br><br>Non-transfer patients (n = 317,005)<br>Q1 (least ready): referent, p = 0.077<br>Q2: 1.34 (0.97 to 1.86)<br>Q3: 1.01 (0.74 to 1.36)<br>Q4 (most ready): 0.69 (0.51 to 0.92)<br><br>Transferred patients (n = 54,999)<br>Q1 (least ready): referent, p = 0.033<br>Q2: 0.99 (0.65 to 1.49)<br>Q3: 0.84 (0.58 to 1.22)<br>Q4 (most ready): 0.59 (0.39 to 0.90) | Demographic characteristics, comorbidities, initial physiology (age-adjusted hypotension), emergent airway intervention, mechanism of injury, Injury severity score (ISS), transfer status, blood transfusion, nonorthopedic surgery, orthopedic surgery, and geographic region | ED pediatric readiness score associated with in-hospital mortality, OR (95% CI):<br><br>Q1 (least ready): 1 (referent)<br>Q2: 1.16 (0.87 to 1.54)<br>Q3: 0.90 (0.70 to 1.17)<br>Q4 (most ready): 0.58 (0.45 to 0.75)                                                                                                                                                                                                                                                                                                                                                                                                                                                                                                                                                                                                                                                                                                                                                                                                                                                                                                                                                                                                                              | In this cohort study, injured children treated in high-readiness EDs had lower mortality compared with similar children in low-readiness EDs, but not fewer complications. These findings support national efforts to increase ED pediatric readiness in US trauma centers that care for children. |

Note: WPRS = Weighted Pediatric Readiness Score, ED = Emergency Department, N/A = Not Applicable, OR = Odds Ratio, Q = Quartile, 95% CI = 95% confidence interval, SD = standard deviation

## Readiness of Emergency Departments for Pediatric Patients: A Systematic Review

**Table 3.** Secondary Outcome: Healthcare Outcomes and Utilization

| Publication                       | Intervention vs. Comparator | Secondary outcome                      | Secondary outcome effect estimate  | Secondary outcome results (unadjusted)                                                                                                                                                                                                               | Variables used to adjust Secondary outcome                                                                                                                                                                                                                                                                                                                                                                          | Secondary outcome results [adjusted]                                                                                                                                                                                                                                 | Conclusion                                                                                                                                                                                                                                                                                                                                                        |
|-----------------------------------|-----------------------------|----------------------------------------|------------------------------------|------------------------------------------------------------------------------------------------------------------------------------------------------------------------------------------------------------------------------------------------------|---------------------------------------------------------------------------------------------------------------------------------------------------------------------------------------------------------------------------------------------------------------------------------------------------------------------------------------------------------------------------------------------------------------------|----------------------------------------------------------------------------------------------------------------------------------------------------------------------------------------------------------------------------------------------------------------------|-------------------------------------------------------------------------------------------------------------------------------------------------------------------------------------------------------------------------------------------------------------------------------------------------------------------------------------------------------------------|
| Ray et al, 2018 <sup>12</sup>     | High WPRS vs. No WPRS       | Access to EDs within a 30-min drive    | Percentage                         | N/A                                                                                                                                                                                                                                                  | ED characteristics (pediatric ED, trauma center level, total volume, triage system)<br><br>Hospital characteristics (bed size, inpatient pediatric ward, pediatric intensive care unit [ICU], neonatal ICU, pediatric cardiology, CT scanner, MRI)<br><br>Accreditations (The Joint Commission, Accreditation Council for Graduate Medical Education)<br><br>Geographic characteristics (rural/urban status, state) | National proportion of pediatric population (%) within 30 minute drive to ED with:<br><br>WPRS of $\geq 83.6$ (75th percentile) = 70.20%<br>WPRS of $\geq 94.3$ (90th percentile) = 55.30%<br>WPRS of 100 = 33.70%<br><br>No WPRS specified score threshold = 93.70% | This study nationally quantified geographic access to EDs, in the US, with high pediatric readiness for children, and indicated major gaps in access are due to the lack of an ED with high pediatric readiness. 1 in 3 children can reach an ED with a max WPRS score. 90.9% of children lived closer to at least 1 alternative ED with a WPRS below the maximum |
| Balmaks et al, 2020 <sup>16</sup> | High WPRS vs. Low WPRS      | Patient length of stay                 | Regression ( $\beta$ ) coefficient | WPRS associated with PICU length of stay and Hospital length of stay, $\beta$ (95% CI), P-value:<br><br>PICU length of stay:<br>$\beta -0.01$ (-0.02 to 0.01), P = 0.410<br><br>Hospital length of stay:<br>$\beta -0.03$ (-0.15 to 0.09), P = 0.614 | Nesting of patients in each ED, and patient demographics                                                                                                                                                                                                                                                                                                                                                            | WPRS associated with PICU length of stay, Hospital length of stay, $\beta$ (95% CI), P-value:<br><br>PICU length of stay:<br>$\beta -0.06$ (-0.10 to -0.01), P = 0.021<br><br>Hospital length of stay:<br>$\beta -0.36$ (-0.61 to -0.10), P = 0.011                  | This study nationally assessed that pediatric readiness in the ED was associated with shorter ICU length of stay, shorter hospital length of stay, and lower 6-month mortality.                                                                                                                                                                                   |
| Lieng et al, 2021 <sup>14</sup>   | High WPRS vs. Low WPRS      | Potentially avoidable transfers (PATs) | OR                                 | 10-point increase in WPRS associated with PATs, OR (95% CI):<br><br>Injured children PATs:<br>OR 0.93 (0.90 to 0.96)<br><br>Noninjured children PATs:<br>OR 0.90 (0.88 to 0.93)                                                                      | Patient demographics, injury/illness severity, complex chronic condition, pediatric volume, trauma center designation, pediatric admitting capability                                                                                                                                                                                                                                                               | 10-point increase in WPRS associated with PATs, OR (95% CI):<br><br>Injured children PATs:<br>OR 0.92 (0.86 to 0.98)<br><br>Noninjured children PATs:<br>OR 0.94 (0.88 to 1.00)                                                                                      | Hospital ED pediatric readiness is associated with lower odds of a PAT. Having a nurse pediatric emergency care coordinator and a quality improvement plan are modifiable risk factors that EDs may target to reduce PATs.                                                                                                                                        |
| Lieng et al, 2021 <sup>15</sup>   | High WPRS vs. Low WPRS      | Interfacility transfer                 | OR                                 | High pediatric readiness score $>70$ associated with interfacility transfers, OR (95% CI), P-value<br>OR 0.64 (0.55 to 0.74), P < 0.01                                                                                                               | Patient demographics, insurance, severity of illness, complex chronic condition, pediatric inpatient capabilities, pediatric volume, proportion Medicaid, index hospital-level                                                                                                                                                                                                                                      | High pediatric readiness score $>70$ associated with interfacility transfers, OR (95% CI), P-value<br>OR 0.55 (0.33 to 0.93), P < 0.05                                                                                                                               | Pediatric patients presenting to EDs at small rural hospitals with high pediatric readiness scores may be less likely to be transferred.                                                                                                                                                                                                                          |

Note: WPRS = Weighted Pediatric Readiness Score, ED = Emergency Department, PAT = Potentially Avoidable Transfers, N/A = Not Applicable, OR = Odds Ratio,  $\beta$  = Regression Coefficient, Q = Quartile, 95% CI = 95% confidence interval, SD = standard deviation

Readiness of Emergency Departments for Pediatric Patients: A Systematic Review

Table 4. Risk of Bias: Newcastle-Ottawa Quality Assessment Scale Summary

| Publication                       | Study design         | Representativeness of the exposed sample (selection bias) | Selection of the non exposed sample (selection bias) | Ascertainment of exposure (selection bias) | Demonstration that outcome of interest was not present at start of study (selection bias) | Comparability of samples on the basis of the design or analysis (comparability bias) | Assessment of Outcome (assessment bias) | Was Follow-Up Long Enough for Outcomes to Occur (follow-up bias) | Adequacy of Follow Up of Cohorts (follow-up bias) | Statistical test (statistical bias) |
|-----------------------------------|----------------------|-----------------------------------------------------------|------------------------------------------------------|--------------------------------------------|-------------------------------------------------------------------------------------------|--------------------------------------------------------------------------------------|-----------------------------------------|------------------------------------------------------------------|---------------------------------------------------|-------------------------------------|
| Ray et al, 2018 <sup>12</sup>     | Cross-sectional      | Low risk                                                  | Low risk                                             | Low risk                                   | High risk                                                                                 | Low risk                                                                             | Low risk                                | N/A                                                              | N/A                                               | Low risk                            |
| Ames et al, 2019 <sup>7</sup>     | Retrospective cohort | Low risk                                                  | Low risk                                             | Low risk                                   | High risk                                                                                 | Low risk                                                                             | Low risk                                | Low risk                                                         | Low risk                                          | N/A                                 |
| Balmaks et al, 2020 <sup>16</sup> | Prospective cohort   | Low risk                                                  | Low risk                                             | Low risk                                   | High risk                                                                                 | Low risk                                                                             | Low risk                                | Low risk                                                         | Low risk                                          | N/A                                 |
| Newgard et al, 2021 <sup>13</sup> | Retrospective cohort | Low risk                                                  | Low risk                                             | Low risk                                   | High risk                                                                                 | Low risk                                                                             | Low risk                                | Low risk                                                         | Low risk                                          | N/A                                 |
| Lieng et al, 2021 <sup>14</sup>   | Cross-sectional      | Low risk                                                  | Low risk                                             | Low risk                                   | High risk                                                                                 | Low risk                                                                             | Low risk                                | N/A                                                              | N/A                                               | Low risk                            |
| Lieng et al, 2021 <sup>15</sup>   | Cross-sectional      | Low risk                                                  | Low risk                                             | Low risk                                   | High risk                                                                                 | Low risk                                                                             | Low risk                                | N/A                                                              | N/A                                               | Low risk                            |

Note: N/A = Not Applicable

## Readiness of Emergency Departments for Pediatric Patients: A Systematic Review

**Figure 1.** PRISMA flow diagrams of articles identified on initial (1a) and updated (1b) screening included in final analysis**Figure 1a.**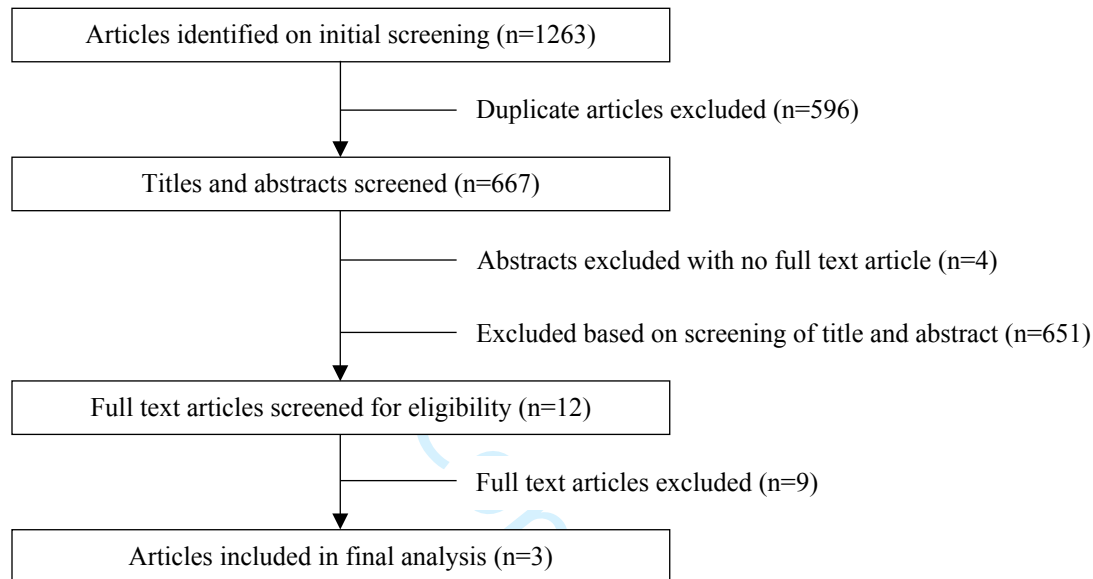**Figure 1b.**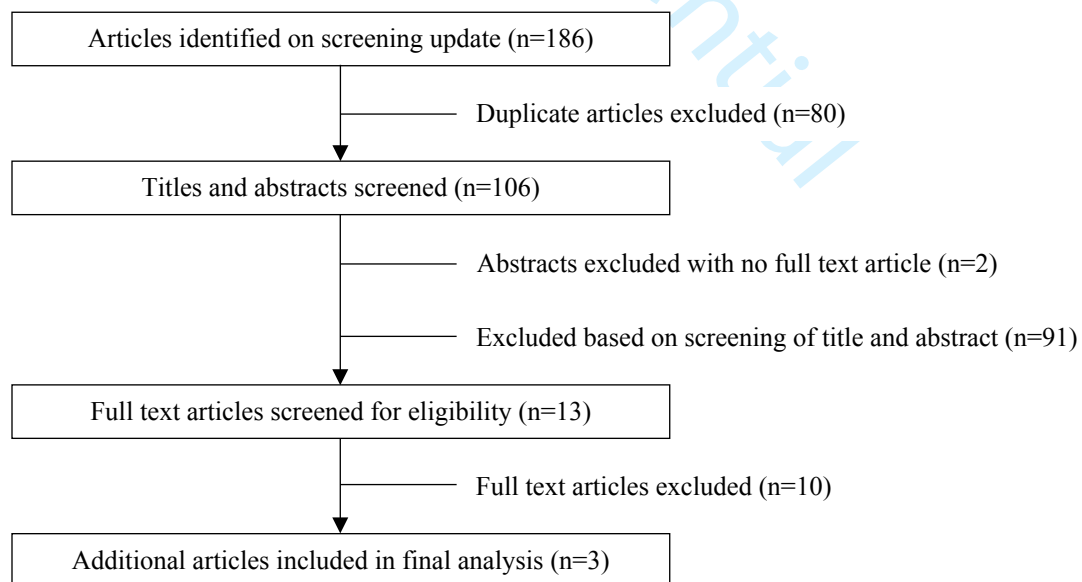



## Readiness of Emergency Departments for Pediatric Patients: A Systematic Review

**Figure 2.** Random effects meta-analysis of the association between mortality and weighted pediatric readiness score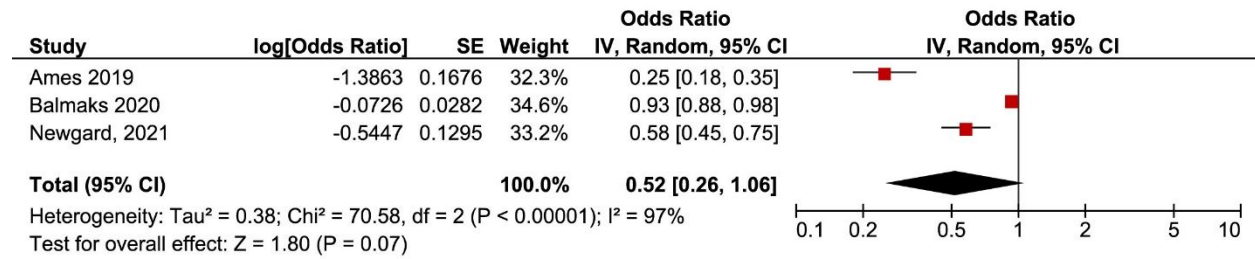

Note: CI= Confidence Interval, IV=Inverse Variance, SE=Standard Error

Confidential

## Readiness of Emergency Departments for Pediatric Patients: A Systematic Review

**Appendix 1. Search Strategy**

**Database(s): Embase 1974 to 2020 May 22, Ovid MEDLINE(R) ALL 1946 to May 22, 2020**

## Search Strategy:

| #  | Searches                                                                                                                                                                                                                                                                                                                                                                                                                                                                                                     | Results |
|----|--------------------------------------------------------------------------------------------------------------------------------------------------------------------------------------------------------------------------------------------------------------------------------------------------------------------------------------------------------------------------------------------------------------------------------------------------------------------------------------------------------------|---------|
| 1  | exp Emergency Service, Hospital/                                                                                                                                                                                                                                                                                                                                                                                                                                                                             | 81863   |
| 2  | exp Emergency Medicine/                                                                                                                                                                                                                                                                                                                                                                                                                                                                                      | 54555   |
| 3  | Emergencies/                                                                                                                                                                                                                                                                                                                                                                                                                                                                                                 | 79791   |
| 4  | exp Emergency Medical Services/                                                                                                                                                                                                                                                                                                                                                                                                                                                                              | 238598  |
| 5  | Trauma Centers/                                                                                                                                                                                                                                                                                                                                                                                                                                                                                              | 106172  |
| 6  | Triage/                                                                                                                                                                                                                                                                                                                                                                                                                                                                                                      | 79729   |
| 7  | Emergency Treatment/                                                                                                                                                                                                                                                                                                                                                                                                                                                                                         | 27354   |
| 8  | Emergency Services, Psychiatric/                                                                                                                                                                                                                                                                                                                                                                                                                                                                             | 2627    |
| 9  | Ambulatory Care/                                                                                                                                                                                                                                                                                                                                                                                                                                                                                             | 78649   |
| 10 | (emergenc\$ adj5 (care\$ or centre\$ or center\$ or department\$ or diagnos\$ or doctor\$ or health care or healthcare or hospital\$ or medicine\$ or nurs\$ or patient\$ or physician\$ or resident\$ or room\$ or service\$ or therap\$ or treatment\$ or unit\$ or ward\$ or visit\$)).mp.                                                                                                                                                                                                                | 677281  |
| 11 | (trauma adj5 (care\$ or centre\$ or center\$ or department\$ or diagnos\$ or doctor\$ or health care or healthcare or hospital\$ or medicine\$ or nurs\$ or patient\$ or physician\$ or resident\$ or room\$ or service\$ or therap\$ or treatment\$ or unit\$ or ward\$ or visit\$)).mp.                                                                                                                                                                                                                    | 174419  |
| 12 | ((urgent or ambulatory or outpatient) adj3 (care\$ or visit\$ or service\$)).tw,kf.                                                                                                                                                                                                                                                                                                                                                                                                                          | 103007  |
| 13 | (emergency or emergencies or trauma).jw.                                                                                                                                                                                                                                                                                                                                                                                                                                                                     | 303584  |
| 14 | emergency.in.                                                                                                                                                                                                                                                                                                                                                                                                                                                                                                | 315103  |
| 15 | or/1-14 [Emergency Room Concept]                                                                                                                                                                                                                                                                                                                                                                                                                                                                             | 1295542 |
| 16 | ((Infan\$ or newborn\$ or new-born\$ or perinat\$ or neonat\$ or baby or baby\$ or babies or toddler\$ or minors or minors\$ or boy or boys or boyfriend or boyhood or girl\$ or kid or kids or child or child\$ or children\$ or schoolchild\$ or schoolchild or school child or school child\$ or adolescen\$ or juvenil\$ or youth\$ or teen\$ or under\$age\$ or pubescen\$ or pediatric\$ or paediatric\$ or peadiatric\$ or prematur\$ or preterm\$) adj5 (ready or readiness or preparedness)).tw,kf. | 4993    |
| 17 | (WPRS and P?ediatric\$).tw,kf.                                                                                                                                                                                                                                                                                                                                                                                                                                                                               | 18      |
| 18 | peds ready.tw,kf.                                                                                                                                                                                                                                                                                                                                                                                                                                                                                            | 3       |
| 19 | or/16-18 [Pediatric Readiness Concept]                                                                                                                                                                                                                                                                                                                                                                                                                                                                       | 4993    |
| 20 | 15 and 19 [Peds Readiness and ER]                                                                                                                                                                                                                                                                                                                                                                                                                                                                            | 673     |
| 21 | 20 use medall                                                                                                                                                                                                                                                                                                                                                                                                                                                                                                | 271     |
| 22 | exp emergency health service/                                                                                                                                                                                                                                                                                                                                                                                                                                                                                | 238598  |
| 23 | exp emergency medicine/                                                                                                                                                                                                                                                                                                                                                                                                                                                                                      | 54555   |
| 24 | exp emergency/                                                                                                                                                                                                                                                                                                                                                                                                                                                                                               | 92866   |
| 25 | exp emergency treatment/                                                                                                                                                                                                                                                                                                                                                                                                                                                                                     | 375865  |
| 26 | exp emergency ward/                                                                                                                                                                                                                                                                                                                                                                                                                                                                                          | 220551  |
| 27 | ambulatory care/                                                                                                                                                                                                                                                                                                                                                                                                                                                                                             | 78649   |
| 28 | (emergenc\$ adj5 (care\$ or centre\$ or center\$ or department\$ or diagnos\$ or doctor\$ or health care or healthcare or hospital\$ or medicine\$ or nurs\$ or patient\$ or physician\$ or                                                                                                                                                                                                                                                                                                                  |         |

# Readiness of Emergency Departments for Pediatric Patients: A Systematic Review

resident\$ or room\$ or service\$ or therap\$ or treatment\$ or unit\$ or ward\$ or visit\$)).mp.  
677281

29 (trauma adj5 (care\$ or centre\$ or center\$ or department\$ or diagnos\$ or doctor\$ or health  
care or healthcare or hospital\$ or medicine\$ or nurs\$ or patient\$ or physician\$ or resident\$ or  
room\$ or service\$ or therap\$ or treatment\$ or unit\$ or ward\$ or visit\$)).mp. 174419

30 ((urgent or ambulatory or outpatient) adj3 (care\$ or visit\$ or service\$)).tw,kw. 103297

31 (emergency or emergencies or trauma).jw. 303584

32 emergency.in. 315103

33 or/22-32 [Emergency Room Concept] 1533859

34 ((Infan\$ or newborn\$ or new-born\$ or perinat\$ or neonat\$ or baby or baby\$ or babies or  
toddler\$ or minors or minors\$ or boy or boys or boyfriend or boyhood or girl\$ or kid or kids or  
child or child\$ or children\$ or schoolchild\$ or schoolchild or school child or school child\$ or  
adolescenc\$ or juvenil\$ or youth\$ or teen\$ or under\$age\$ or pubescen\$ or pediatric\$ or  
paediatric\$ or peadiatric\$ or prematur\$ or preterm\$) adj5 (ready or readiness or  
preparedness)).tw,kw. 5020

35 (WPRS and P?ediatric\$).tw,kw. 18

36 peds ready.tw,kw. 3

37 or/34-36 [Pediatric Readiness Concept] 5020

38 33 and 37 [Peds Readiness and ER] 745

39 38 use oomezd 448

40 21 or 39 719

41 remove duplicates from 40 473

42 41 use medall 267

43 41 use oomezd 206

# Reporting checklist for systematic review (with or without a meta-analysis).

Based on the PRISMA guidelines.

|                      | Reporting Item                                                                                                                                                                                                                                                                                      | Page Number |
|----------------------|-----------------------------------------------------------------------------------------------------------------------------------------------------------------------------------------------------------------------------------------------------------------------------------------------------|-------------|
| <b>Title</b>         |                                                                                                                                                                                                                                                                                                     |             |
| Title                | <a href="#">#1</a> Identify the report as a systematic review                                                                                                                                                                                                                                       | 1           |
| <b>Abstract</b>      |                                                                                                                                                                                                                                                                                                     |             |
| Abstract             | <a href="#">#2</a> Report an abstract addressing each item in the PRISMA 2020 for Abstracts checklist                                                                                                                                                                                               | 2           |
| <b>Introduction</b>  |                                                                                                                                                                                                                                                                                                     |             |
| Background/rationale | <a href="#">#3</a> Describe the rationale for the review in the context of existing knowledge                                                                                                                                                                                                       | 3           |
| Objectives           | <a href="#">#4</a> Provide an explicit statement of the objective(s) or question(s) the review addresses                                                                                                                                                                                            | 3           |
| <b>Methods</b>       |                                                                                                                                                                                                                                                                                                     |             |
| Eligibility criteria | <a href="#">#5</a> Specify the inclusion and exclusion criteria for the review and how studies were grouped for the syntheses                                                                                                                                                                       | 4           |
| Information sources  | <a href="#">#6</a> Specify all databases, registers, websites, organisations, reference lists, and other sources searched or consulted to identify studies. Specify the date when each source was last searched or consulted                                                                        | 3           |
| Search strategy      | <a href="#">#7</a> Present the full search strategies for all databases, registers, and websites, including any filters and limits used                                                                                                                                                             | 3, Appendix |
| Selection process    | <a href="#">#8</a> Specify the methods used to decide whether a study met the inclusion criteria of the review, including how many reviewers screened each record and each report retrieved, whether they worked independently, and, if applicable, details of automation tools used in the process | 4           |

|    |                    |                      |                                                                |   |
|----|--------------------|----------------------|----------------------------------------------------------------|---|
| 1  | Data collection    | <a href="#">#9</a>   | Specify the methods used to collect data from reports,         | 4 |
| 2  | process            |                      | including how many reviewers collected data from each          |   |
| 3  |                    |                      | report, whether they worked independently, any processes for   |   |
| 4  |                    |                      | obtaining or confirming data from study investigators, and, if |   |
| 5  |                    |                      | applicable, details of automation tools used in the process    |   |
| 6  |                    |                      |                                                                |   |
| 7  |                    |                      |                                                                |   |
| 8  |                    |                      |                                                                |   |
| 9  | Data items         | <a href="#">#10a</a> | List and define all outcomes for which data were sought.       | 4 |
| 10 |                    |                      | Specify whether all results that were compatible with each     |   |
| 11 |                    |                      | outcome domain in each study were sought (for example, for     |   |
| 12 |                    |                      | all measures, time points, analyses), and, if not, the methods |   |
| 13 |                    |                      | used to decide which results to collect                        |   |
| 14 |                    |                      |                                                                |   |
| 15 |                    |                      |                                                                |   |
| 16 |                    |                      |                                                                |   |
| 17 | Study risk of bias | <a href="#">#11</a>  | Specify the methods used to assess risk of bias in the         | 4 |
| 18 | assessment         |                      | included studies, including details of the tool(s) used, how   |   |
| 19 |                    |                      | many reviewers assessed each study and whether they            |   |
| 20 |                    |                      | worked independently, and, if applicable, details of           |   |
| 21 |                    |                      | automation tools used in the process                           |   |
| 22 |                    |                      |                                                                |   |
| 23 |                    |                      |                                                                |   |
| 24 |                    |                      |                                                                |   |
| 25 |                    |                      |                                                                |   |
| 26 | Effect measures    | <a href="#">#12</a>  | Specify for each outcome the effect measure(s) (such as risk   | 4 |
| 27 |                    |                      | ratio, mean difference) used in the synthesis or presentation  |   |
| 28 |                    |                      | of results                                                     |   |
| 29 |                    |                      |                                                                |   |
| 30 |                    |                      |                                                                |   |
| 31 | Synthesis methods  | <a href="#">#13a</a> | Describe the processes used to decide which studies were       | 4 |
| 32 |                    |                      | eligible for each synthesis (such as tabulating the study      |   |
| 33 |                    |                      | intervention characteristics and comparing against the         |   |
| 34 |                    |                      | planned groups for each synthesis (item #5))                   |   |
| 35 |                    |                      |                                                                |   |
| 36 |                    |                      |                                                                |   |
| 37 |                    |                      |                                                                |   |
| 38 | Synthesis methods  | <a href="#">#13b</a> | Describe any methods required to prepare the data for          | 4 |
| 39 |                    |                      | presentation or synthesis, such as handling of missing         |   |
| 40 |                    |                      | summary statistics or data conversions                         |   |
| 41 |                    |                      |                                                                |   |
| 42 |                    |                      |                                                                |   |
| 43 | Synthesis methods  | <a href="#">#13c</a> | Describe any methods used to tabulate or visually display      | 4 |
| 44 |                    |                      | results of individual studies and syntheses                    |   |
| 45 |                    |                      |                                                                |   |
| 46 |                    |                      |                                                                |   |
| 47 | Synthesis methods  | <a href="#">#13d</a> | Describe any methods used to synthesise results and provide    | 4 |
| 48 |                    |                      | a rationale for the choice(s). If meta-analysis was performed, |   |
| 49 |                    |                      | describe the model(s), method(s) to identify the presence and  |   |
| 50 |                    |                      | extent of statistical heterogeneity, and software package(s)   |   |
| 51 |                    |                      | used                                                           |   |
| 52 |                    |                      |                                                                |   |
| 53 |                    |                      |                                                                |   |
| 54 |                    |                      |                                                                |   |
| 55 | Synthesis methods  | <a href="#">#13e</a> | Describe any methods used to explore possible causes of        | 4 |
| 56 |                    |                      | heterogeneity among study results (such as subgroup            |   |
| 57 |                    |                      | analysis, meta-regression)                                     |   |
| 58 |                    |                      |                                                                |   |
| 59 |                    |                      |                                                                |   |
| 60 |                    |                      |                                                                |   |

|    |                               |                      |                                                                                                                                                                                                                                                                                                                                       |                                 |
|----|-------------------------------|----------------------|---------------------------------------------------------------------------------------------------------------------------------------------------------------------------------------------------------------------------------------------------------------------------------------------------------------------------------------|---------------------------------|
| 1  | Synthesis methods             | <a href="#">#13f</a> | Describe any sensitivity analyses conducted to assess robustness of the synthesised results                                                                                                                                                                                                                                           | 4                               |
| 2  |                               |                      |                                                                                                                                                                                                                                                                                                                                       |                                 |
| 3  |                               |                      |                                                                                                                                                                                                                                                                                                                                       |                                 |
| 4  |                               |                      |                                                                                                                                                                                                                                                                                                                                       |                                 |
| 5  | Reporting bias assessment     | <a href="#">#14</a>  | Describe any methods used to assess risk of bias due to missing results in a synthesis (arising from reporting biases)                                                                                                                                                                                                                | 4                               |
| 6  |                               |                      |                                                                                                                                                                                                                                                                                                                                       |                                 |
| 7  |                               |                      |                                                                                                                                                                                                                                                                                                                                       |                                 |
| 8  |                               |                      |                                                                                                                                                                                                                                                                                                                                       |                                 |
| 9  | Certainty assessment          | <a href="#">#15</a>  | Describe any methods used to assess certainty (or confidence) in the body of evidence for an outcome                                                                                                                                                                                                                                  | 4                               |
| 10 |                               |                      |                                                                                                                                                                                                                                                                                                                                       |                                 |
| 11 |                               |                      |                                                                                                                                                                                                                                                                                                                                       |                                 |
| 12 | Data items                    | <a href="#">#10b</a> | List and define all other variables for which data were sought (such as participant and intervention characteristics, funding sources). Describe any assumptions made about any missing or unclear information                                                                                                                        | 4                               |
| 13 |                               |                      |                                                                                                                                                                                                                                                                                                                                       |                                 |
| 14 |                               |                      |                                                                                                                                                                                                                                                                                                                                       |                                 |
| 15 |                               |                      |                                                                                                                                                                                                                                                                                                                                       |                                 |
| 16 |                               |                      |                                                                                                                                                                                                                                                                                                                                       |                                 |
| 17 |                               |                      |                                                                                                                                                                                                                                                                                                                                       |                                 |
| 18 |                               |                      |                                                                                                                                                                                                                                                                                                                                       |                                 |
| 19 | <b>Results</b>                |                      |                                                                                                                                                                                                                                                                                                                                       |                                 |
| 20 |                               |                      |                                                                                                                                                                                                                                                                                                                                       |                                 |
| 21 |                               |                      |                                                                                                                                                                                                                                                                                                                                       |                                 |
| 22 | Study selection               | <a href="#">#16a</a> | Describe the results of the search and selection process, from the number of records identified in the search to the number of studies included in the review, ideally using a flow diagram ( <a href="http://www.prisma-statement.org/PRISMAStatement/FlowDiagram">http://www.prisma-statement.org/PRISMAStatement/FlowDiagram</a> ) | 5, Figure 1                     |
| 23 |                               |                      |                                                                                                                                                                                                                                                                                                                                       |                                 |
| 24 |                               |                      |                                                                                                                                                                                                                                                                                                                                       |                                 |
| 25 |                               |                      |                                                                                                                                                                                                                                                                                                                                       |                                 |
| 26 |                               |                      |                                                                                                                                                                                                                                                                                                                                       |                                 |
| 27 |                               |                      |                                                                                                                                                                                                                                                                                                                                       |                                 |
| 28 |                               |                      |                                                                                                                                                                                                                                                                                                                                       |                                 |
| 29 |                               |                      |                                                                                                                                                                                                                                                                                                                                       |                                 |
| 30 | Study selection               | <a href="#">#16b</a> | Cite studies that might appear to meet the inclusion criteria, but which were excluded, and explain why they were excluded                                                                                                                                                                                                            | 5, Figure 1                     |
| 31 |                               |                      |                                                                                                                                                                                                                                                                                                                                       |                                 |
| 32 |                               |                      |                                                                                                                                                                                                                                                                                                                                       |                                 |
| 33 |                               |                      |                                                                                                                                                                                                                                                                                                                                       |                                 |
| 34 |                               |                      |                                                                                                                                                                                                                                                                                                                                       |                                 |
| 35 | Study characteristics         | <a href="#">#17</a>  | Cite each included study and present its characteristics                                                                                                                                                                                                                                                                              | 5, Table 1                      |
| 36 |                               |                      |                                                                                                                                                                                                                                                                                                                                       |                                 |
| 37 |                               |                      |                                                                                                                                                                                                                                                                                                                                       |                                 |
| 38 | Risk of bias in studies       | <a href="#">#18</a>  | Present assessments of risk of bias for each included study                                                                                                                                                                                                                                                                           | 6, Table 4                      |
| 39 |                               |                      |                                                                                                                                                                                                                                                                                                                                       |                                 |
| 40 | Results of individual studies | <a href="#">#19</a>  | For all outcomes, present for each study (a) summary statistics for each group (where appropriate) and (b) an effect estimate and its precision (such as confidence/credible interval), ideally using structured tables or plots                                                                                                      | 5-6, Table 2, Table 3, Figure 2 |
| 41 |                               |                      |                                                                                                                                                                                                                                                                                                                                       |                                 |
| 42 |                               |                      |                                                                                                                                                                                                                                                                                                                                       |                                 |
| 43 |                               |                      |                                                                                                                                                                                                                                                                                                                                       |                                 |
| 44 |                               |                      |                                                                                                                                                                                                                                                                                                                                       |                                 |
| 45 |                               |                      |                                                                                                                                                                                                                                                                                                                                       |                                 |
| 46 |                               |                      |                                                                                                                                                                                                                                                                                                                                       |                                 |
| 47 | Results of syntheses          | <a href="#">#20a</a> | For each synthesis, briefly summarise the characteristics and risk of bias among contributing studies                                                                                                                                                                                                                                 | 5-6, Table 4                    |
| 48 |                               |                      |                                                                                                                                                                                                                                                                                                                                       |                                 |
| 49 |                               |                      |                                                                                                                                                                                                                                                                                                                                       |                                 |
| 50 |                               |                      |                                                                                                                                                                                                                                                                                                                                       |                                 |
| 51 | Results of syntheses          | <a href="#">#20b</a> | Present results of all statistical syntheses conducted. If meta-analysis was done, present for each the summary estimate and its precision (such as confidence/credible interval) and measures of statistical heterogeneity. If comparing groups, describe the direction of the effect                                                | 5-6, Figure 2                   |
| 52 |                               |                      |                                                                                                                                                                                                                                                                                                                                       |                                 |
| 53 |                               |                      |                                                                                                                                                                                                                                                                                                                                       |                                 |
| 54 |                               |                      |                                                                                                                                                                                                                                                                                                                                       |                                 |
| 55 |                               |                      |                                                                                                                                                                                                                                                                                                                                       |                                 |
| 56 |                               |                      |                                                                                                                                                                                                                                                                                                                                       |                                 |
| 57 |                               |                      |                                                                                                                                                                                                                                                                                                                                       |                                 |
| 58 |                               |                      |                                                                                                                                                                                                                                                                                                                                       |                                 |
| 59 |                               |                      |                                                                                                                                                                                                                                                                                                                                       |                                 |
| 60 |                               |                      |                                                                                                                                                                                                                                                                                                                                       |                                 |

|    |                                       |                      |                                                                                                                                               |                                 |
|----|---------------------------------------|----------------------|-----------------------------------------------------------------------------------------------------------------------------------------------|---------------------------------|
| 1  | Results of syntheses                  | <a href="#">#20c</a> | Present results of all investigations of possible causes of heterogeneity among study results                                                 | 5-6, Figure 2                   |
| 2  |                                       |                      |                                                                                                                                               |                                 |
| 3  |                                       |                      |                                                                                                                                               |                                 |
| 4  | Results of syntheses                  | <a href="#">#20d</a> | Present results of all sensitivity analyses conducted to assess the robustness of the synthesised results                                     | 5-6, Figure 2                   |
| 5  |                                       |                      |                                                                                                                                               |                                 |
| 6  |                                       |                      |                                                                                                                                               |                                 |
| 7  |                                       |                      |                                                                                                                                               |                                 |
| 8  | Risk of reporting biases in syntheses | <a href="#">#21</a>  | Present assessments of risk of bias due to missing results (arising from reporting biases) for each synthesis assessed                        | 6, Table 4                      |
| 9  |                                       |                      |                                                                                                                                               |                                 |
| 10 |                                       |                      |                                                                                                                                               |                                 |
| 11 | Certainty of evidence                 | <a href="#">#22</a>  | Present assessments of certainty (or confidence) in the body of evidence for each outcome assessed                                            | 5-6, Figure 2                   |
| 12 |                                       |                      |                                                                                                                                               |                                 |
| 13 |                                       |                      |                                                                                                                                               |                                 |
| 14 |                                       |                      |                                                                                                                                               |                                 |
| 15 |                                       |                      |                                                                                                                                               |                                 |
| 16 | <b>Discussion</b>                     |                      |                                                                                                                                               |                                 |
| 17 |                                       |                      |                                                                                                                                               |                                 |
| 18 | Results in context                    | <a href="#">#23a</a> | Provide a general interpretation of the results in the context of other evidence                                                              | 6-7                             |
| 19 |                                       |                      |                                                                                                                                               |                                 |
| 20 |                                       |                      |                                                                                                                                               |                                 |
| 21 | Limitations of included studies       | <a href="#">#23b</a> | Discuss any limitations of the evidence included in the review                                                                                | 7                               |
| 22 |                                       |                      |                                                                                                                                               |                                 |
| 23 |                                       |                      |                                                                                                                                               |                                 |
| 24 | Limitations of the review methods     | <a href="#">#23c</a> | Discuss any limitations of the review processes used                                                                                          | 7                               |
| 25 |                                       |                      |                                                                                                                                               |                                 |
| 26 |                                       |                      |                                                                                                                                               |                                 |
| 27 | Implications                          | <a href="#">#23d</a> | Discuss implications of the results for practice, policy, and future research                                                                 | 7                               |
| 28 |                                       |                      |                                                                                                                                               |                                 |
| 29 |                                       |                      |                                                                                                                                               |                                 |
| 30 |                                       |                      |                                                                                                                                               |                                 |
| 31 |                                       |                      |                                                                                                                                               |                                 |
| 32 |                                       |                      |                                                                                                                                               |                                 |
| 33 |                                       |                      |                                                                                                                                               |                                 |
| 34 | <b>Other information</b>              |                      |                                                                                                                                               |                                 |
| 35 |                                       |                      |                                                                                                                                               |                                 |
| 36 | Registration and protocol             | <a href="#">#24a</a> | Provide registration information for the review, including register name and registration number, or state that the review was not registered | 2                               |
| 37 |                                       |                      |                                                                                                                                               |                                 |
| 38 |                                       |                      |                                                                                                                                               |                                 |
| 39 |                                       |                      |                                                                                                                                               |                                 |
| 40 |                                       |                      |                                                                                                                                               |                                 |
| 41 | Registration and protocol             | <a href="#">#24b</a> | Indicate where the review protocol can be accessed, or state that a protocol was not prepared                                                 | 2                               |
| 42 |                                       |                      |                                                                                                                                               |                                 |
| 43 |                                       |                      |                                                                                                                                               |                                 |
| 44 |                                       |                      |                                                                                                                                               |                                 |
| 45 | Registration and protocol             | <a href="#">#24c</a> | Describe and explain any amendments to information provided at registration or in the protocol                                                | N/A - no amendments to protocol |
| 46 |                                       |                      |                                                                                                                                               |                                 |
| 47 |                                       |                      |                                                                                                                                               |                                 |
| 48 |                                       |                      |                                                                                                                                               |                                 |
| 49 |                                       |                      |                                                                                                                                               |                                 |
| 50 | Support                               | <a href="#">#25</a>  | Describe sources of financial or non-financial support for the review, and the role of the funders or sponsors in the review                  | 1                               |
| 51 |                                       |                      |                                                                                                                                               |                                 |
| 52 |                                       |                      |                                                                                                                                               |                                 |
| 53 |                                       |                      |                                                                                                                                               |                                 |
| 54 | Competing interests                   | <a href="#">#26</a>  | Declare any competing interests of review authors                                                                                             | 1                               |
| 55 |                                       |                      |                                                                                                                                               |                                 |
| 56 |                                       |                      |                                                                                                                                               |                                 |
| 57 |                                       |                      |                                                                                                                                               |                                 |
| 58 |                                       |                      |                                                                                                                                               |                                 |
| 59 |                                       |                      |                                                                                                                                               |                                 |
| 60 |                                       |                      |                                                                                                                                               |                                 |



1 Availability of data, [#27](#) Report which of the following are publicly available and Appendix 1  
2 code, and other where they can be found: template data collection forms; data  
3 materials extracted from included studies; data used for all analyses;  
4 analytic code; any other materials used in the review  
5  
6  
7  
8  
9

- 10 • The PRISMA checklist is distributed under the terms of the Creative Commons Attribution License CC-  
11 BY. This checklist was completed on 26. November 2021 using <https://www.goodreports.org/>, a tool made  
12 by the [EQUATOR Network](#) in collaboration with [Penelope.ai](#)  
13  
14  
15  
16  
17  
18  
19  
20  
21  
22  
23  
24  
25  
26  
27  
28  
29  
30  
31  
32  
33  
34  
35  
36  
37  
38  
39  
40  
41  
42  
43  
44  
45  
46  
47  
48  
49  
50  
51  
52  
53  
54  
55  
56  
57  
58  
59  
60

Confidential
